# Supplementary material
Source: Springer Nature journal article supplement (https://www.springermedizin.de/resource/supplementary/12889_2012_5224_MOESM2_ESM.pdf/9495104)

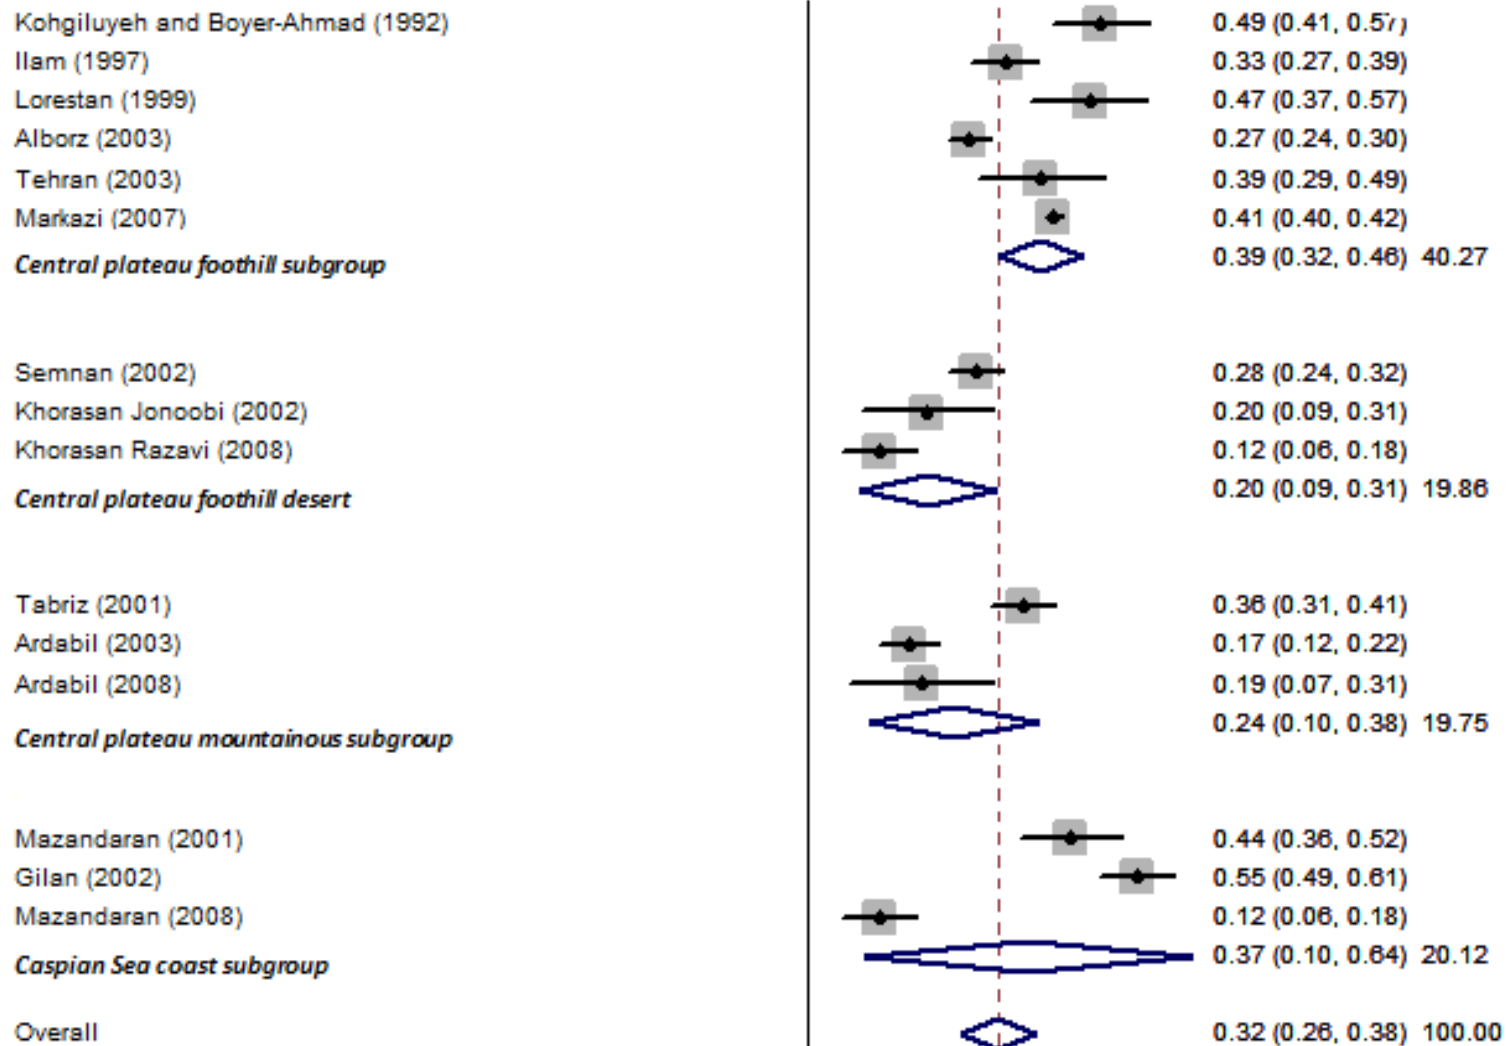

Weights are from random effects analysis

Supplement: MOESM2 [file 9495104]
